# Supplementary material for: iTRAQ-Based Proteomics Analysis of Response to Solanum tuberosum Leaves Treated with the Plant Phytotoxin Thaxtomin A
Source: MDPI journal article supplement (doi:10.3390/ijms222112036), 2021-11-07
Supplement: s1 [file s1]

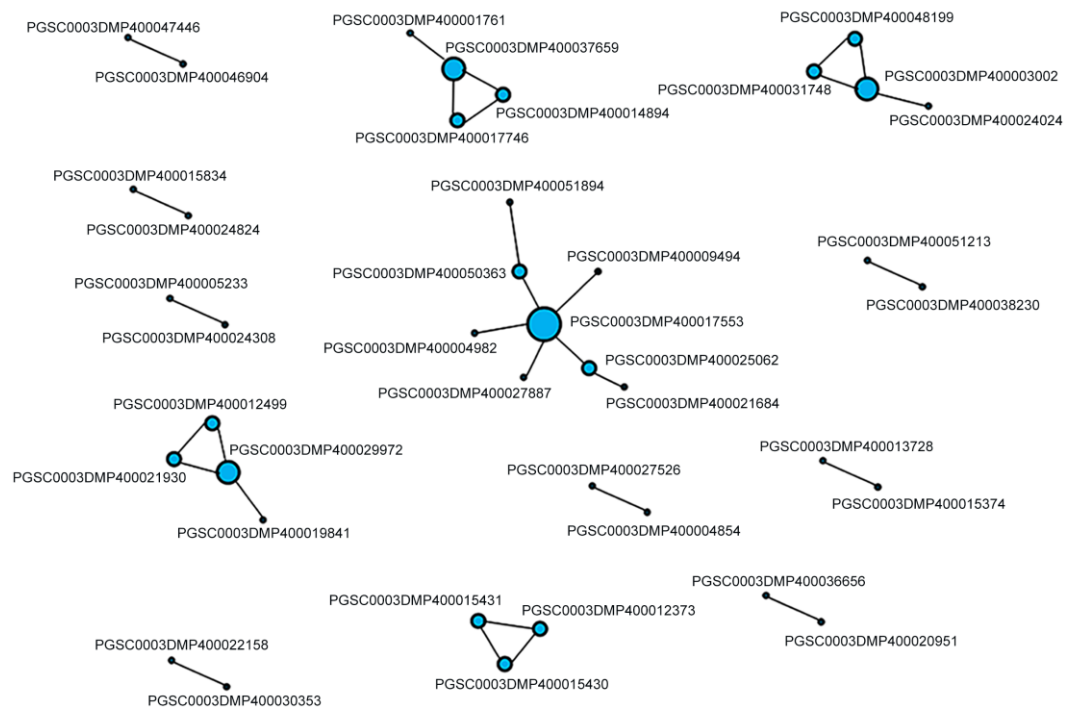

Figure S1 Protein interaction network. Each node represents a protein, and the line between nodes represents the interaction between the two proteins. The size of the node represents the number of the interacting proteins.
