# Supplementary material for: iTRAQ-Based Proteomics Analysis of Response to Solanum tuberosum Leaves Treated with the Plant Phytotoxin Thaxtomin A
Source: MDPI journal article supplement (doi:10.3390/ijms222112036), 2021-11-07
Supplement: s1 [file s1]

Table S1. GO enrichment analysis of DEPs

| GO Description                               | GO<br>Term(Level1) | GO ID      | Protein<br>Number |
|----------------------------------------------|--------------------|------------|-------------------|
| Biological_process                           | BP                 | GO:0008150 | 392               |
| Single-organism process                      | BP                 | GO:0044699 | 204               |
| Single-organism metabolic process            | BP                 | GO:0044710 | 166               |
| Oxidation-reduction process                  | BP                 | GO:0055114 | 99                |
| Response to stimulus                         | BP                 | GO:0050896 | 65                |
| Response to stress                           | BP                 | GO:0006950 | 53                |
| Single-organism catabolic process            | BP                 | GO:0044712 | 29                |
| Protein folding                              | BP                 | GO:0006457 | 21                |
| Defense response                             | BP                 | GO:0006952 | 18                |
| Response to oxidative stress                 | BP                 | GO:0006979 | 17                |
| Detoxification                               | BP                 | GO:0098754 | 17                |
| Cellular oxidant detoxification              | BP                 | GO:0098869 | 17                |
| Cellular detoxification                      | BP                 | GO:1990748 | 17                |
| Protein complex subunit organization         | BP                 | GO:0071822 | 15                |
| Photosynthesis                               | BP                 | GO:0015979 | 15                |
| Organonitrogen compound catabolic process    | BP                 | GO:1901565 | 14                |
| Response to biotic stimulus                  | BP                 | GO:0009607 | 13                |
| Protein complex assembly                     | BP                 | GO:0006461 | 13                |
| Cell redox homeostasis                       | BP                 | GO:0045454 | 13                |
| Monocarboxylic acid biosynthetic process     | BP                 | GO:0072330 | 12                |
| Negative regulation of molecular function    | BP                 | GO:0044092 | 11                |
| Aromatic amino acid family metabolic process | BP                 | GO:0009072 | 11                |
| Reactive oxygen species metabolic process    | BP                 | GO:0072593 | 10                |
| Negative regulation of catalytic activity    | BP                 | GO:0043086 | 10                |
| Small molecule catabolic process             | BP                 | GO:0044282 | 9                 |
| Electron transport chain                     | BP                 | GO:0022900 | 9                 |
| Cellular protein complex assembly            | BP                 | GO:0043623 | 9                 |
| Photosynthetic electron transport chain      | BP                 | GO:0009767 | 8                 |

|                                                                               |    |            |   |
|-------------------------------------------------------------------------------|----|------------|---|
| Organic acid catabolic process                                                | BP | GO:0016054 | 8 |
| Hydrogen peroxide metabolic process                                           | BP | GO:0042743 | 8 |
| Hydrogen peroxide catabolic process                                           | BP | GO:0042744 | 8 |
| Carboxylic acid catabolic process                                             | BP | GO:0046395 | 8 |
| Aromatic compound catabolic process                                           | BP | GO:0019439 | 8 |
| Regulation of proteolysis                                                     | BP | GO:0030162 | 7 |
| Regulation of peptidase activity                                              | BP | GO:0052547 | 7 |
| Regulation of endopeptidase activity                                          | BP | GO:0052548 | 7 |
| Negative regulation of proteolysis                                            | BP | GO:0045861 | 7 |
| Negative regulation of protein metabolic process                              | BP | GO:0051248 | 7 |
| Negative regulation of peptidase activity                                     | BP | GO:0010466 | 7 |
| Negative regulation of hydrolase activity                                     | BP | GO:0051346 | 7 |
| Negative regulation of endopeptidase activity                                 | BP | GO:0010951 | 7 |
| Negative regulation of cellular protein metabolic process                     | BP | GO:0032269 | 7 |
| Lipid catabolic process                                                       | BP | GO:0016042 | 7 |
| Carbohydrate derivative catabolic process                                     | BP | GO:1901136 | 7 |
| Secondary metabolic process                                                   | BP | GO:0019748 | 6 |
| Response to bacterium                                                         | BP | GO:0009617 | 6 |
| Phenylpropanoid metabolic process                                             | BP | GO:0009698 | 6 |
| Glycerol ether metabolic process                                              | BP | GO:0006662 | 6 |
| Ether metabolic process                                                       | BP | GO:0018904 | 6 |
| Defense response to bacterium                                                 | BP | GO:0042742 | 6 |
| Cellular amino acid catabolic process                                         | BP | GO:0009063 | 6 |
| Aromatic amino acid family biosynthetic process                               | BP | GO:0009073 | 6 |
| Alpha-amino acid catabolic process                                            | BP | GO:1901606 | 6 |
| Alcohol metabolic process                                                     | BP | GO:0006066 | 6 |
| Secondary metabolite biosynthetic process                                     | BP | GO:0044550 | 5 |
| Phenylpropanoid biosynthetic process                                          | BP | GO:0009699 | 5 |
| L-phenylalanine metabolic process                                             | BP | GO:0006558 | 5 |
| Erythrose 4-phosphate/phosphoenolpyruvate family amino acid metabolic process | BP | GO:1902221 | 5 |

|                                                                               |    |            |   |
|-------------------------------------------------------------------------------|----|------------|---|
| Benzene-containing compound metabolic process                                 | BP | GO:0042537 | 5 |
| Aromatic amino acid family catabolic process                                  | BP | GO:0009074 | 5 |
| Response to water deprivation                                                 | BP | GO:0009414 | 4 |
| Response to light intensity                                                   | BP | GO:0009642 | 4 |
| Reductive pentose-phosphate cycle                                             | BP | GO:0019253 | 4 |
| Photosynthetic electron transport in photosystem II                           | BP | GO:0009772 | 4 |
| Photosynthesis, dark reaction                                                 | BP | GO:0019685 | 4 |
| Photorespiration                                                              | BP | GO:0009853 | 4 |
| L-phenylalanine catabolic process                                             | BP | GO:0006559 | 4 |
| Erythrose 4-phosphate/phosphoenolpyruvate family amino acid catabolic process | BP | GO:1902222 | 4 |
| Cinnamic acid metabolic process                                               | BP | GO:0009803 | 4 |
| Cinnamic acid biosynthetic process                                            | BP | GO:0009800 | 4 |
| Chorismate metabolic process                                                  | BP | GO:0046417 | 4 |
| Response to high light intensity                                              | BP | GO:0009644 | 3 |
| Regulation of photosynthesis, light reaction                                  | BP | GO:0042548 | 3 |
| Regulation of generation of precursor metabolites and energy                  | BP | GO:0043467 | 3 |
| Photosynthesis, light reaction                                                | BP | GO:0019684 | 3 |
| Oxylipin metabolic process                                                    | BP | GO:0031407 | 3 |
| Oxylipin biosynthetic process                                                 | BP | GO:0031408 | 3 |
| NADH dehydrogenase complex assembly                                           | BP | GO:0010257 | 3 |
| Jasmonic acid metabolic process                                               | BP | GO:0009694 | 3 |
| Jasmonic acid biosynthetic process                                            | BP | GO:0009695 | 3 |
| Cytochrome complex assembly                                                   | BP | GO:0017004 | 3 |
| Chorismate biosynthetic process                                               | BP | GO:0009423 | 3 |
| Cellular response to radiation                                                | BP | GO:0071478 | 3 |
| Cellular response to light stimulus                                           | BP | GO:0071482 | 3 |
| Cellular response to abiotic stimulus                                         | BP | GO:0071214 | 3 |
| Response to endoplasmic reticulum stress                                      | BP | GO:0034976 | 2 |
| Regulation of transporter activity                                            | BP | GO:0032409 | 2 |
| Regulation of transmembrane transporter activity                              | BP | GO:0022898 | 2 |

|                                                            |    |            |     |
|------------------------------------------------------------|----|------------|-----|
| Regulation of proton transport                             | BP | GO:0010155 | 2   |
| Regulation of ion transmembrane transporter activity       | BP | GO:0032412 | 2   |
| Regulation of anion channel activity                       | BP | GO:0010359 | 2   |
| Protein K63-linked ubiquitination                          | BP | GO:0070534 | 2   |
| Phototropism                                               | BP | GO:0009638 | 2   |
| Nucleoside catabolic process                               | BP | GO:0009164 | 2   |
| NADH dehydrogenase complex (plastoquinone) assembly        | BP | GO:0010258 | 2   |
| Modification of morphology or physiology of other organism | BP | GO:0035821 | 2   |
| Glycosyl compound catabolic process                        | BP | GO:1901658 | 2   |
| Glutamine biosynthetic process                             | BP | GO:0006542 | 2   |
| Cytochrome b6f complex assembly                            | BP | GO:0010190 | 2   |
| Cellular response to light intensity                       | BP | GO:0071484 | 2   |
| Membrane                                                   | CC | GO:0016020 | 74  |
| Chloroplast part                                           | CC | GO:0044434 | 59  |
| Plastid part                                               | CC | GO:0044435 | 59  |
| Thylakoid part                                             | CC | GO:0044436 | 49  |
| Photosynthetic membrane                                    | CC | GO:0034357 | 37  |
| Thylakoid membrane                                         | CC | GO:0042651 | 37  |
| Plastid thylakoid membrane                                 | CC | GO:0055035 | 37  |
| Chloroplast thylakoid membrane                             | CC | GO:0009535 | 37  |
| Extracellular region                                       | CC | GO:0005576 | 20  |
| Thylakoid lumen                                            | CC | GO:0031977 | 12  |
| Endoplasmic reticulum part                                 | CC | GO:0044432 | 11  |
| Golgi apparatus                                            | CC | GO:0005794 | 9   |
| Endoplasmic reticulum membrane                             | CC | GO:0005789 | 9   |
| Photosystem I reaction center                              | CC | GO:0009538 | 5   |
| NAD(P)H dehydrogenase complex (plastoquinone)              | CC | GO:0010598 | 3   |
| Catalytic activity                                         | MF | GO:0003824 | 278 |
| Oxidoreductase activity                                    | MF | GO:0016491 | 96  |
| Metal ion binding                                          | MF | GO:0046872 | 89  |
| Cation binding                                             | MF | GO:0043169 | 89  |

|                                                                                                                                                                      |    |            |    |
|----------------------------------------------------------------------------------------------------------------------------------------------------------------------|----|------------|----|
| Tetrapyrrole binding                                                                                                                                                 | MF | GO:0046906 | 30 |
| Heme binding                                                                                                                                                         | MF | GO:0020037 | 25 |
| Lyase activity                                                                                                                                                       | MF | GO:0016829 | 22 |
| Hydrolase activity, acting on glycosyl bonds                                                                                                                         | MF | GO:0016798 | 19 |
| Calcium ion binding                                                                                                                                                  | MF | GO:0005509 | 18 |
| Hydrolase activity, hydrolyzing O-glycosyl compounds                                                                                                                 | MF | GO:0004553 | 17 |
| Antioxidant activity                                                                                                                                                 | MF | GO:0016209 | 17 |
| Monooxygenase activity                                                                                                                                               | MF | GO:0004497 | 16 |
| Peroxidase activity                                                                                                                                                  | MF | GO:0004601 | 14 |
| Oxidoreductase activity, acting on peroxide as acceptor                                                                                                              | MF | GO:0016684 | 14 |
| Iron ion binding                                                                                                                                                     | MF | GO:0005506 | 14 |
| Oxidoreductase activity, acting on paired donors, with incorporation or reduction of molecular oxygen                                                                | MF | GO:0016705 | 12 |
| Oxidoreductase activity, acting on NAD(P)H                                                                                                                           | MF | GO:0016651 | 11 |
| Oxidoreductase activity, acting on a sulfur group of donors                                                                                                          | MF | GO:0016667 | 11 |
| Enzyme inhibitor activity                                                                                                                                            | MF | GO:0004857 | 10 |
| protein disulfide oxidoreductase activity                                                                                                                            | MF | GO:0015035 | 8  |
| Disulfide oxidoreductase activity                                                                                                                                    | MF | GO:0015036 | 8  |
| Carboxy-lyase activity                                                                                                                                               | MF | GO:0016831 | 8  |
| Transferase activity, transferring alkyl or aryl (other than methyl) groups                                                                                          | MF | GO:0016765 | 7  |
| Peptidase regulator activity                                                                                                                                         | MF | GO:0061134 | 7  |
| Peptidase inhibitor activity                                                                                                                                         | MF | GO:0030414 | 7  |
| Oxidoreductase activity, acting on NAD(P)H, quinone or similar compound as acceptor                                                                                  | MF | GO:0016655 | 7  |
| Endopeptidase regulator activity                                                                                                                                     | MF | GO:0061135 | 7  |
| Endopeptidase inhibitor activity                                                                                                                                     | MF | GO:0004866 | 7  |
| Oxidoreductase activity, acting on paired donors, with incorporation or reduction of molecular oxygen, NAD(P)H as one donor, and incorporation of one atom of oxygen | MF | GO:0016709 | 5  |
| Glucosidase activity                                                                                                                                                 | MF | GO:0015926 | 5  |

|                                                                                                                      |    |            |   |
|----------------------------------------------------------------------------------------------------------------------|----|------------|---|
| Ribulose-bisphosphate carboxylase activity                                                                           | MF | GO:0016984 | 4 |
| Quinone binding                                                                                                      | MF | GO:0048038 | 4 |
| Phenylalanine ammonia-lyase activity                                                                                 | MF | GO:0045548 | 4 |
| Oxidoreductase activity, acting on a sulfur group of donors, disulfide as acceptor                                   | MF | GO:0016671 | 4 |
| Beta-glucosidase activity                                                                                            | MF | GO:0008422 | 4 |
| Ammonia-lyase activity                                                                                               | MF | GO:0016841 | 4 |
| Acid phosphatase activity                                                                                            | MF | GO:0003993 | 4 |
| Glucan endo-1,3-beta-D-glucosidase activity                                                                          | MF | GO:0042973 | 3 |
| Electron transporter, transferring electrons within the cyclic electron transport pathway of photosynthesis activity | MF | GO:0045156 | 3 |
| Chitin binding                                                                                                       | MF | GO:0008061 | 3 |
| Carbon-oxygen lyase activity, acting on phosphates                                                                   | MF | GO:0016838 | 3 |
| Tyramine N-feruloyltransferase activity                                                                              | MF | GO:0050366 | 2 |
| Trans-cinnamate 4-monooxygenase activity                                                                             | MF | GO:0016710 | 2 |
| Terpene synthase activity                                                                                            | MF | GO:0010333 | 2 |
| Oxidoreductase activity, acting on the CH-NH2 group of donors, NAD or NADP as acceptor                               | MF | GO:0016639 | 2 |
| Hydroxymethylglutaryl-CoA synthase activity                                                                          | MF | GO:0004421 | 2 |
| Glutamate-ammonia ligase activity                                                                                    | MF | GO:0004356 | 2 |
| Ammonia ligase activity                                                                                              | MF | GO:0016211 | 2 |
| Acid-ammonia (or amide) ligase activity                                                                              | MF | GO:0016880 | 2 |
| 3-hydroxyacyl-CoA dehydrogenase activity                                                                             | MF | GO:0003857 | 2 |
| 3-deoxy-7-phosphoheptulonate synthase activity                                                                       | MF | GO:0003849 | 2 |

BP: Biological Process; CC: Cellular Component; MF: Molecular Function
