# Supplementary material for: iTRAQ-Based Proteomics Analysis of Response to Solanum tuberosum Leaves Treated with the Plant Phytotoxin Thaxtomin A
Source: MDPI journal article supplement (doi:10.3390/ijms222112036), 2021-11-07
Supplement: s1 [file s1]

Table S2. KEGG enrichment analysis of DEPs

| KEGG Description                                     | Pathway ID | Protein Number |
|------------------------------------------------------|------------|----------------|
| Protein processing in endoplasmic reticulum          | sot04141   | 33             |
| Phenylpropanoid biosynthesis                         | sot00940   | 26             |
| Carbon metabolism                                    | sot01200   | 26             |
| Biosynthesis of amino acids                          | sot01230   | 24             |
| Glutathione metabolism                               | sot00480   | 18             |
| Photosynthesis                                       | sot00195   | 17             |
| Carbon fixation in photosynthetic organisms          | sot00710   | 12             |
| Phenylalanine, tyrosine, and tryptophan biosynthesis | sot00400   | 11             |
| Plant-pathogen interaction                           | sot04626   | 11             |
| Amino sugar and nucleotide sugar metabolism          | sot00520   | 11             |
| alpha-Linolenic acid metabolism                      | sot00592   | 10             |
| Phenylalanine metabolism                             | sot00360   | 10             |
| Fatty acid degradation                               | sot00071   | 10             |
| Glyoxylate and dicarboxylate metabolism              | sot00630   | 10             |
| Glycolysis/Gluconeogenesis                           | sot00010   | 10             |
| Alanine, aspartate, and glutamate metabolism         | sot00250   | 9              |
| Fatty acid metabolism                                | sot01212   | 9              |
| Valine, leucine, and isoleucine degradation          | sot00280   | 8              |
| Peroxisome                                           | sot04146   | 8              |
| Starch and sucrose metabolism                        | sot00500   | 8              |
| Ascorbate and aldarate metabolism                    | sot00053   | 7              |
| MAPK signaling pathway - plant                       | sot04016   | 7              |
| Phagosome                                            | sot04145   | 7              |
| RNA transport                                        | sot03013   | 7              |
| Spliceosome                                          | sot03040   | 7              |
| Butanoate metabolism                                 | sot00650   | 6              |
| Ubiquinone and other terpenoid-quinone biosynthesis  | sot00130   | 6              |
| Pentose phosphate pathway                            | sot00030   | 6              |
| Pyrimidine metabolism                                | sot00240   | 6              |

|                                                         |          |   |
|---------------------------------------------------------|----------|---|
| Pyruvate metabolism                                     | sot00620 | 6 |
| Oxidative phosphorylation                               | sot00190 | 6 |
| Ribosome                                                | sot03010 | 6 |
| Stilbenoid, diarylheptanoid, and gingerol biosynthesis  | sot00945 | 5 |
| Flavonoid biosynthesis                                  | sot00941 | 5 |
| Biosynthesis of unsaturated fatty acids                 | sot01040 | 5 |
| Nitrogen metabolism                                     | sot00910 | 5 |
| Arginine biosynthesis                                   | sot00220 | 5 |
| Tyrosine metabolism                                     | sot00350 | 5 |
| Cyanoamino acid metabolism                              | sot00460 | 5 |
| Protein export                                          | sot03060 | 5 |
| 2-Oxocarboxylic acid metabolism                         | sot01210 | 5 |
| Fructose and mannose metabolism                         | sot00051 | 5 |
| Citrate cycle (TCA cycle)                               | sot00020 | 5 |
| Cysteine and methionine metabolism                      | sot00270 | 5 |
| Steroid biosynthesis                                    | sot00100 | 4 |
| Isoquinoline alkaloid biosynthesis                      | sot00950 | 4 |
| Lysine degradation                                      | sot00310 | 4 |
| beta-Alanine metabolism                                 | sot00410 | 4 |
| Terpenoid backbone biosynthesis                         | sot00900 | 4 |
| Endocytosis                                             | sot04144 | 4 |
| Synthesis and degradation of ketone bodies              | sot00072 | 3 |
| Tropane, piperidine, and pyridine alkaloid biosynthesis | sot00960 | 3 |
| Arginine and proline metabolism                         | sot00330 | 3 |
| Propanoate metabolism                                   | sot00640 | 3 |
| Galactose metabolism                                    | sot00052 | 3 |
| Glycerolipid metabolism                                 | sot00561 | 3 |
| Plant hormone signal transduction                       | sot04075 | 3 |
| Glycerophospholipid metabolism                          | sot00564 | 3 |
| RNA degradation                                         | sot03018 | 3 |
| Diterpenoid biosynthesis                                | sot00904 | 2 |

|                                                            |          |   |
|------------------------------------------------------------|----------|---|
| Taurine and hypotaurine metabolism                         | sot00430 | 2 |
| Linoleic acid metabolism                                   | sot00591 | 2 |
| Other glycan degradation                                   | sot00511 | 2 |
| Sphingolipid metabolism                                    | sot00600 | 2 |
| Selenocompound metabolism                                  | sot00450 | 2 |
| Carotenoid biosynthesis                                    | sot00906 | 2 |
| Pentose and glucuronate interconversions                   | sot00040 | 2 |
| Tryptophan metabolism                                      | sot00380 | 2 |
| Phosphatidylinositol signaling system                      | sot04070 | 2 |
| Inositol phosphate metabolism                              | sot00562 | 2 |
| Porphyrin and chlorophyll metabolism                       | sot00860 | 2 |
| Fatty acid biosynthesis                                    | sot00061 | 2 |
| Ribosome biogenesis in eukaryotes                          | sot03008 | 2 |
| Photosynthesis - antenna proteins                          | sot00196 | 2 |
| Ubiquitin-mediated proteolysis                             | sot04120 | 2 |
| Purine metabolism                                          | sot00230 | 2 |
| Brassinosteroid biosynthesis                               | sot00905 | 1 |
| Sesquiterpenoid and triterpenoid biosynthesis              | sot00909 | 1 |
| Glycosylphosphatidylinositol (GPI)-anchor biosynthesis     | sot00563 | 1 |
| Indole alkaloid biosynthesis                               | sot00901 | 1 |
| Glycosphingolipid biosynthesis - globo and isoglobo series | sot00603 | 1 |
| Zeatin biosynthesis                                        | sot00908 | 1 |
| Glycosaminoglycan degradation                              | sot00531 | 1 |
| AGE-RAGE signaling pathway in diabetic complications       | sot04933 | 1 |
| Sulfur relay system                                        | sot04122 | 1 |
| Arachidonic acid metabolism                                | sot00590 | 1 |
| Mismatch repair                                            | sot03430 | 1 |
| Autophagy - other                                          | sot04136 | 1 |
| Biotin metabolism                                          | sot00780 | 1 |
| Thiamine metabolism                                        | sot00730 | 1 |
| Valine, leucine, and isoleucine biosynthesis               | sot00290 | 1 |

|                                        |          |   |
|----------------------------------------|----------|---|
| Nicotinate and nicotinamide metabolism | sot00760 | 1 |
| Ether lipid metabolism                 | sot00565 | 1 |
| Homologous recombination               | sot03440 | 1 |
| DNA replication                        | sot03030 | 1 |
| Nucleotide excision repair             | sot03420 | 1 |
| Sulfur metabolism                      | sot00920 | 1 |
| Histidine metabolism                   | sot00340 | 1 |
| Aminoacyl-tRNA biosynthesis            | sot00970 | 1 |
| Proteasome                             | sot03050 | 1 |
| mRNA surveillance pathway              | sot03015 | 1 |
