# Supplementary material for: iTRAQ-Based Proteomics Analysis of Response to Solanum tuberosum Leaves Treated with the Plant Phytotoxin Thaxtomin A
Source: MDPI journal article supplement (doi:10.3390/ijms222112036), 2021-11-07
Supplement: s1 [file s1]

Table S3. Primers used in qRT-PCR

| Accession No.        | Description                                | Sequence (5' to 3')         | Fold Change |
|----------------------|--------------------------------------------|-----------------------------|-------------|
| PGSC0003DMP400021162 | Peroxidase                                 | F: CCTCGTTGCTCTCTCTGGTG     | 4.103267    |
|                      |                                            | R: CCACTACGCGGACAATTTGC     |             |
| PGSC0003DMP400059654 | Peroxidase                                 | F: AGTTGTCCAAGAACAGGAGGTG   | 3.459259    |
|                      |                                            | R: GTGCAAAAGCCCTTTCTTTGC    |             |
| PGSC0003DMP400000820 | Copper/zinc superoxide dismutase           | F: ATGAAGTAAATGCAGCAACAGC   | 1.32017     |
|                      |                                            | R: TTATTGGTAACCCGAAGAGGAG   |             |
| PGSC0003DMP400003634 | Cysteine-rich secretory protein family     | F: CCTAAAGCAAAATGGGGTTG     | 1.990189    |
|                      |                                            | R: CACGGGCATCGTTGTGAA       |             |
| PGSC0003DMP400051894 | Hsp90 protein                              | F: TATTATGAAAGCCCTTAACCCC   | 2.005472    |
|                      |                                            | R: TGAGCCAATGAATTACTACCCTAC |             |
| PGSC0003DMP400002803 | Pathogenesis-related protein Bet vI family | F: TGCCCCTTCTAGGTTGTTCA     | 3.064176    |
|                      |                                            | R: TCTCCCTCAGCCTCAATGTTT    |             |
| PGSC0003DMP400002693 | Pathogenesis-related protein Bet vI family | F: CTGCTGGAGATGGAGTTGT      | 2.554622    |
|                      |                                            | R: ACAGAAGGATTAGCAAGGAGGTA  |             |
| PGSC0003DMP400062364 | Glycosyl hydrolases family 17              | F: GTCTGCTGGTGCATTTGGTG     | 2.116653    |
|                      |                                            | R: TAGGTCCAGGCTTTCTCGGA     |             |

|                      |                                                           |                           |          |
|----------------------|-----------------------------------------------------------|---------------------------|----------|
| PGSC0003DMP400053803 | NAD                                                       | F: GCACTATGATTTCCTCCGACTT | 1.463713 |
|                      |                                                           | R: TTCCATTCTCTACTTGCTCCT  |          |
| PGSC0003DMP400034650 | ATPase family associated with various cellular activities | F: GCACAACAGCAGCTTATCGG   | 0.9      |
|                      |                                                           | R: TGCCCTTCTTCAGCACTCC    |          |
| PGSC0003DMP400003405 | Phosphoglucomutase                                        | F: ATTGAGCACAAAATACCGACTG | 1.010274 |
|                      |                                                           | R: CATGCCAACTTCCCTCCTACA  |          |
| PGSC0003DMP400025999 | Acetyltransferase                                         | F: TGCTCCTCAACTTCCTACACCA | 7.174355 |
|                      |                                                           | R: TCGTAGCCAGACGGACTCTT   |          |
| PGSC0003DMP400036207 | Ras family                                                | F: TCCTCCAACATTTGCCCAT    | 1.309073 |
|                      |                                                           | R: CCACTCTATTCCCCATCACTTT |          |
| PGSC0003DMP400046968 | Mitochondrial carrier protein                             | F: CCCTTGGTAGGAGCCAAATAT  | 1.762727 |
|                      |                                                           | R: CGTTGCTGTAATGGTGGAGAA  |          |
| PGSC0003DMP400022299 | Peroxidase                                                | F: TGACAGGGACTAACGGTGAAA  | 3.266057 |
|                      |                                                           | R: TGCGCTAACTGAACGAACTAA  |          |
| PGSC0003DMP400000965 | Carbonic anhydrase                                        | F: TTTGTGGTGGGCTTTGGTAG   | 0.773168 |
|                      |                                                           | R: TCTGGGAATCCTCTTGTTGCT  |          |
| PGSC0003DMP400026922 | Short chain dehydrogenase                                 | F: AAAGAGCCTTCGTTACAGC    | 0.694582 |
|                      |                                                           | R: TGGCCTTTGGAGGTACATTT   |          |

|                      |                                                     |                          |          |
|----------------------|-----------------------------------------------------|--------------------------|----------|
| PGSC0003DMP400041818 | Ribulose-1,5-bisphosphate carboxylase small subunit | F: TCATTGCCTACAAGCCAGAAG | 0.714299 |
|                      |                                                     | R: CGGAATCGAGGAAAATACACC |          |
